# Supplementary material for: The direct Z-scheme character and roles of S vacancy in BiOCl/Bi2S3-(001) heterostructures for superior photocatalytic activity: a hybrid density functional investigation
Source: Royal Society of Chemistry journal article supplement (doi:10.1039/d3cp06297j), 2024-01-01
Supplement: d3cp06297j1.pdf [file d3cp06297j1.pdf]

## Supporting Information

### The direct Z-scheme character and roles of S vacancy in BiOCl/Bi<sub>2</sub>S<sub>3</sub>-(001) heterostructure for the superior photocatalytic activity: A hybrid density functional investigation

Wentao Wang <sup>a\*</sup>, Zuoyin Liu <sup>b</sup>, Hongwei Nie <sup>b</sup>, Bo Kong <sup>b\*</sup>

a. Guizhou Provincial Key Laboratory of Computational Nano-Material Science, Guizhou Education University, Guiyang, 550018, China;

b. School of Physics and Astronomy, China West Normal University, Nanchong 637002, China;

E-mail: wtwang@gznc.edu.cn (W. W.); xihuakb@163.com (B. K.);

#### Note S1. Ab into molecular dynamic (AIMD)

Ab into molecular dynamic (AIMD) simulations are performed to evaluate the thermal stabilities of the adopted models with a canonical ensemble (NVT) and a simulation temperature of 300 K<sup>-1</sup>. In the AIMD simulations, the Anderson thermostat is employed with a time step of 1 fs, and the total AIMD time is 8 ps.

#### Note S2. Carrier mobility

The mobility along the x and y directions of BiOCl/Bi<sub>2</sub>S<sub>3</sub>-(001) and BiOCl/V<sub>S</sub>-Bi<sub>2</sub>S<sub>3</sub>-(001) can be calculated on the basis of effective mass approximation with deformation potential (DP) theory using the following equation <sup>2</sup>:

$$\mu = \frac{e\hbar^3 C_{2D}}{k_B T m^* m_d E_d^2} \quad (1)$$

where  $e$ ,  $\hbar$ ,  $k_B$ , and  $T$  are the electron charge, simplified Planck constant, Boltzmann constant, and temperature ( $T = 300$  K in our calculation), respectively;  $C_{2D}$  is the elastic modulus of the materials and can be obtained from  $C_{2D} = 2[\partial^2 E / \partial \delta^2] / S_0$ , where  $E$  is the total energy of the material after applying the strain ( $\delta = \Delta l / l_0$ ) along the  $a$  or  $b$  axis, and  $S_0$  is the unstrained area. The  $m^*$  is the effective mass of the electron or hole in the  $x$  or  $y$  direction, and the average effective mass is defined as:  $m_d = \sqrt{m_x^* m_y^*}$ . The final parameter, DP constant  $E_d$  is calculated by  $E_d = \partial E_{edge} / \partial (\Delta l / l_0)$ , where  $E_{edge}$  represents the energy of the VBM or CBM under the strain.

### Note S3. The hydrogen evolution reaction process

The Gibbs free energy difference ( $\Delta G$ ) is calculated using the following equation<sup>3</sup>:

$$\Delta G = \Delta E + \Delta E_{ZPE} - T\Delta S + \Delta G_U + \Delta G_{pH} \quad (2)$$

where  $\Delta E$ ,  $\Delta E_{ZPE}$ , and  $\Delta S$  represent the differences in absorption energy, zero-point energy, and entropy between products and reactants of the reactions, respectively.  $\Delta G_U = -qU$ , with  $q$  being the charge of the carrier and  $U$  being the potential of the carrier, relative to the standard water reduction potential of  $H^+/H_2$ , which depends on the  $pH$  value in the solution.  $\Delta G_{pH}$  ( $\Delta G_{pH} = K_B T \times \ln 10 \times pH$ ) represents the free energy contributed in different  $pH$  concentrations.

The equations involved in HER can be expressed as <sup>4, 5</sup>:

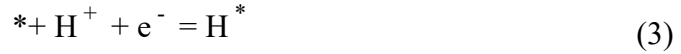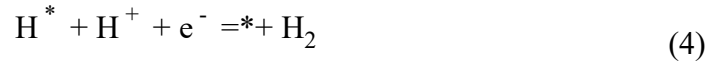

$$\Delta G_h = G(H^*) - G(*) - 0.5G(H_2) + 0.059 \times pH - eU \quad (5)$$

$$\Delta G'_h = G(*) - G(H^*) + 0.5G(H_2) + 0.059 \times pH - eU \quad (6)$$

where  $*$  represents the active adsorption sites on the  $BiOCl/Bi_2S_3$ -(001) and  $BiOCl/V_S$ - $Bi_2S_3$ -(001) heterostructures, and  $H^*$  represents the adsorption states during the HER process.

### Note S4. Optical absorption

The optical absorption coefficient  $A(\omega)$  of the 2D material is calculated using the formula  $A(\omega) = \omega L \epsilon_2(\omega)/c$ <sup>6</sup>, where  $L$  is the vacuum thickness, and  $c$  is the vacuum speed of light. This approach is used to calculate the dielectric constant in the "Linear Optical Spectra for Two Dimensional Semiconductors" module of the VASPKIT code<sup>7</sup>.

### Reference

1. S. Nosé, *J. Chem. Phys.*, 1984, **81**, 511-519.
2. Y. He, M. Zhang, J.-j. Shi, Y.-l. Cen and M. Wu, *J. Phys. Chem. C*, 2019, **123**, 12781-12790.
3. J. K. Nørskov, J. Rossmeisl, A. Logadottir, L. Lindqvist, J. R. Kitchin, T. Bligaard and H. Jónsson, *J. Phys. Chem. B*, 2004, **108**, 17886-17892.
4. W. Tang, G. Wang, C. Fu, B. Wang, H. Yuan and H. Chen, *Appl. Surf. Sci.*, 2023, **626**, 157247.
5. X. Chen, W. Han, Z. Tian, Q. Yue, C. Peng, C. Wang, B. Wang, H. Yin and Q. Gu, *J. Phys. Chem. C*, 2023, **127**, 6347-6355.
6. L. Matthes, P. Gori, O. Pulci and F. Bechstedt, *Phys. Rev. B*, 2013, **87**, 035438.
7. V. Wang, N. Xu, J. C. Liu, G. Tang and W. T. Geng, *Comput. Phys. Commun.*, 2021, **267**,

108033.
